# Supplementary material for: A model for the water-oxidation and recovery systems of the oxygen-evolving complex
Source: Royal Society of Chemistry journal article supplement (doi:10.1039/c3dt52846d), 2013-12-10
Supplement: c3dt52846d.pdf [file c3dt52846d.pdf]

***Electronic Supplementary Information  
prepared for Dalton Transactions***

**Address correspondence to:**

Seiji Ogo, Professor  
International Institute for Carbon–Neutral Energy Research  
(WPI-I2CNER), Kyushu University  
744 Moto–oka, Nishi–ku, Fukuoka  
819–0395, Japan  
Phone: 81-92-802-2818  
Fax: 81-92-802-2823  
E-mail: [ogotcm@mail.cstm.kyushu-u.ac.jp](mailto:ogotcm@mail.cstm.kyushu-u.ac.jp)

**A model for the water-oxidation and recovery systems  
of the oxygen-evolving complex**

*A table of contents*

|          |          |
|----------|----------|
| Fig. S1  | page S1  |
| Fig. S2  | page S2  |
| Fig. S3  | page S3  |
| Fig. S4  | page S4  |
| Fig. S5  | page S5  |
| Fig. S6  | page S6  |
| Fig. S7  | page S7  |
| Fig. S8  | page S8  |
| Fig. S9  | page S9  |
| Fig. S10 | page S10 |
| Fig. S11 | page S11 |
| Fig. S12 | page S12 |
| Fig. S13 | page S13 |
| Fig. S14 | page S14 |
| Fig. S15 | page S15 |
| Fig. S16 | page S16 |

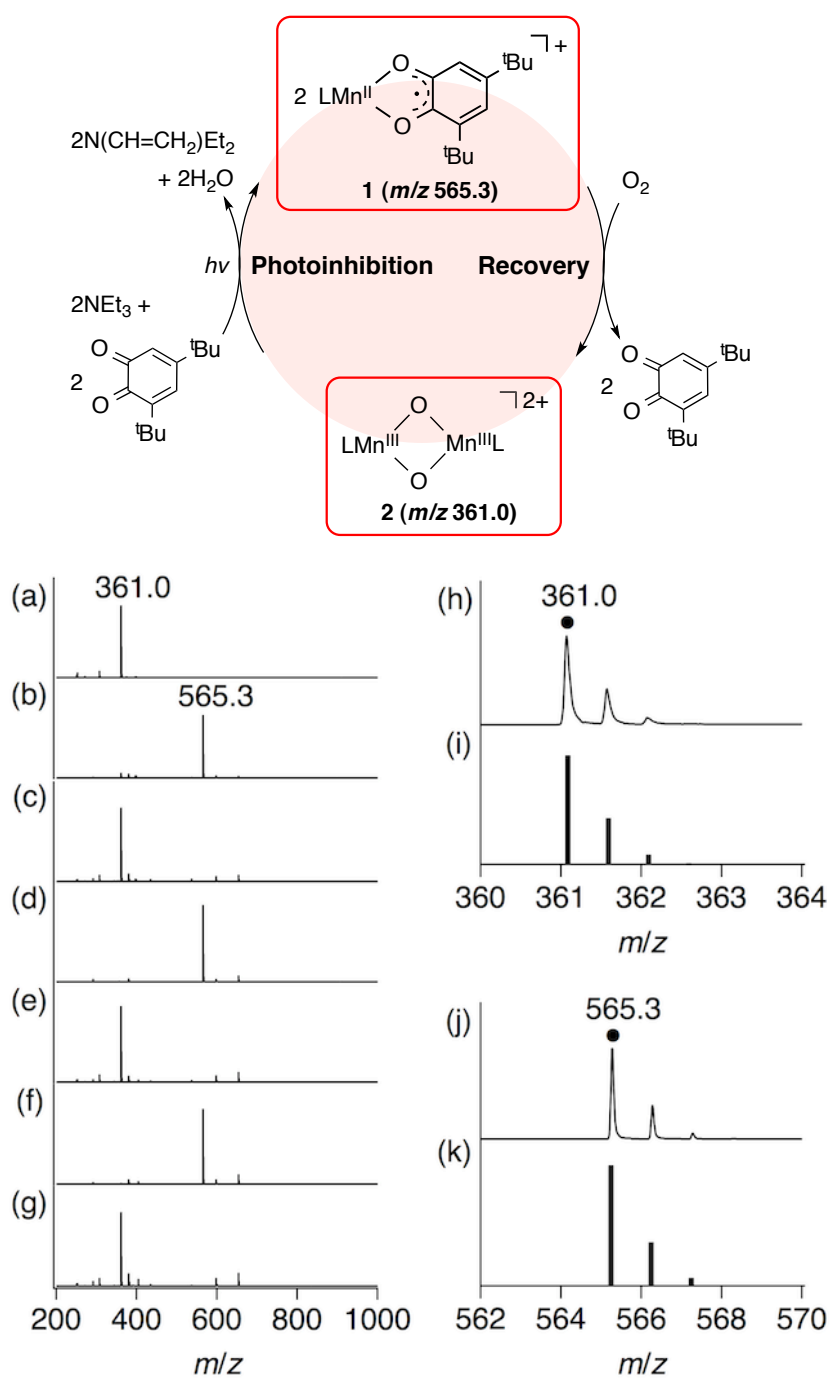

**Fig. S1** Positive-ion ESI mass spectral change for the repeated cycle of photoreduction of **2** and oxygenation of **1**. The spectra of **1** shown in (b), (d) and (f) were obtained from photo-irradiation of **2** shown in (a), (c) and (e), respectively. The spectra of **2** shown in (c), (e) and (g) were obtained from oxygenation of **1** shown in (b), (d) and (f), respectively. (h) The signal at  $m/z$  361.0 corresponds to  $[\mathbf{2}]^{2+}$ . (i) Calculated isotopic distribution for  $[\mathbf{2}]^{2+}$ . (j) The signal at  $m/z$  565.3 corresponds to  $[\mathbf{1}]^+$ . (k) Calculated isotopic distribution for  $[\mathbf{1}]^+$ .

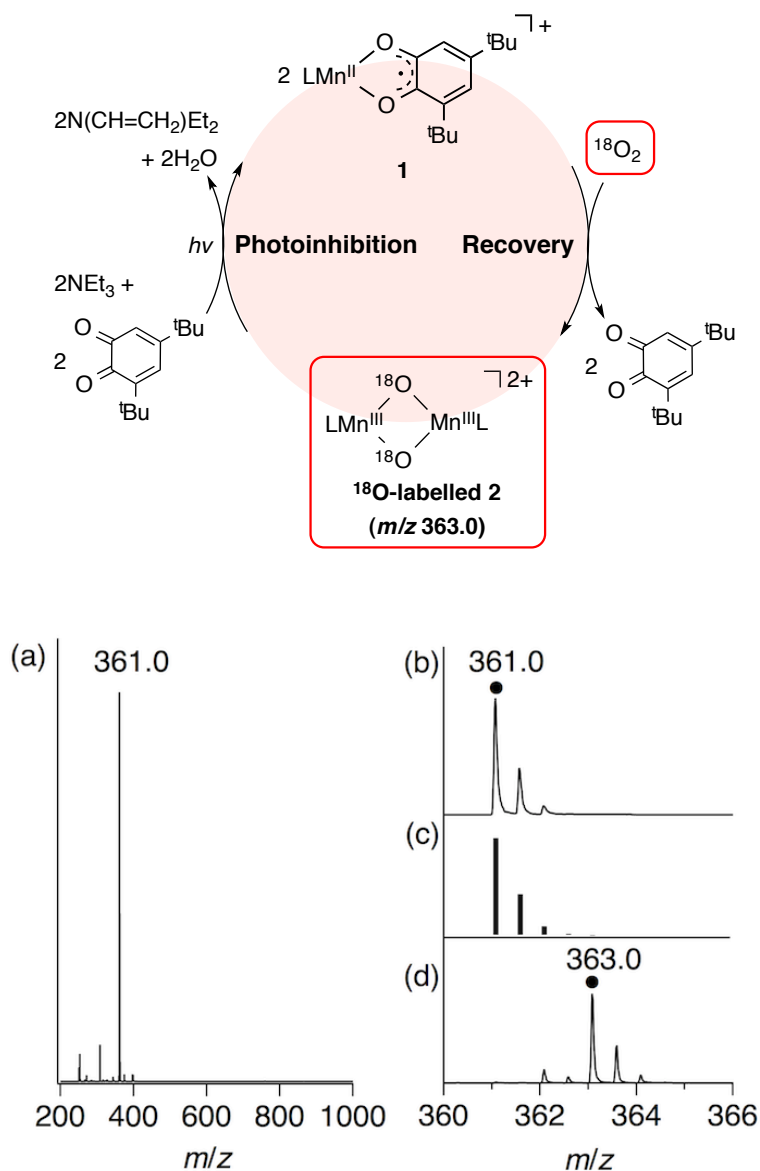

**Fig. S2** (a) Positive-ion ESI mass spectrum of **2** in  $\text{CH}_3\text{CN}$ , which is obtained from the photo-irradiation of **2** and successive oxygenation of **1**. (b) The signal at  $m/z$  361.0 corresponds to  $[\mathbf{2}]^{2+}$ . (c) Calculated isotopic distribution for  $[\mathbf{2}]^{2+}$ . (d) Positive-ion ESI mass spectrum of  $[\text{Mn}^{\text{III,III}}_2(\text{TPA})_2(\mu\text{-}^{18}\text{O})_2]^{2+}$  ( $^{18}\text{O}$ -labelled **2**) in  $\text{CH}_3\text{CN}$ , which is obtained from the photo-irradiation of **2** and successive oxygenation of **1** using  $^{18}\text{O}_2$ . (b) The signal at  $m/z$  363.0 corresponds to  $[\text{}^{18}\text{O}\text{-labelled } \mathbf{2}]^{2+}$ .

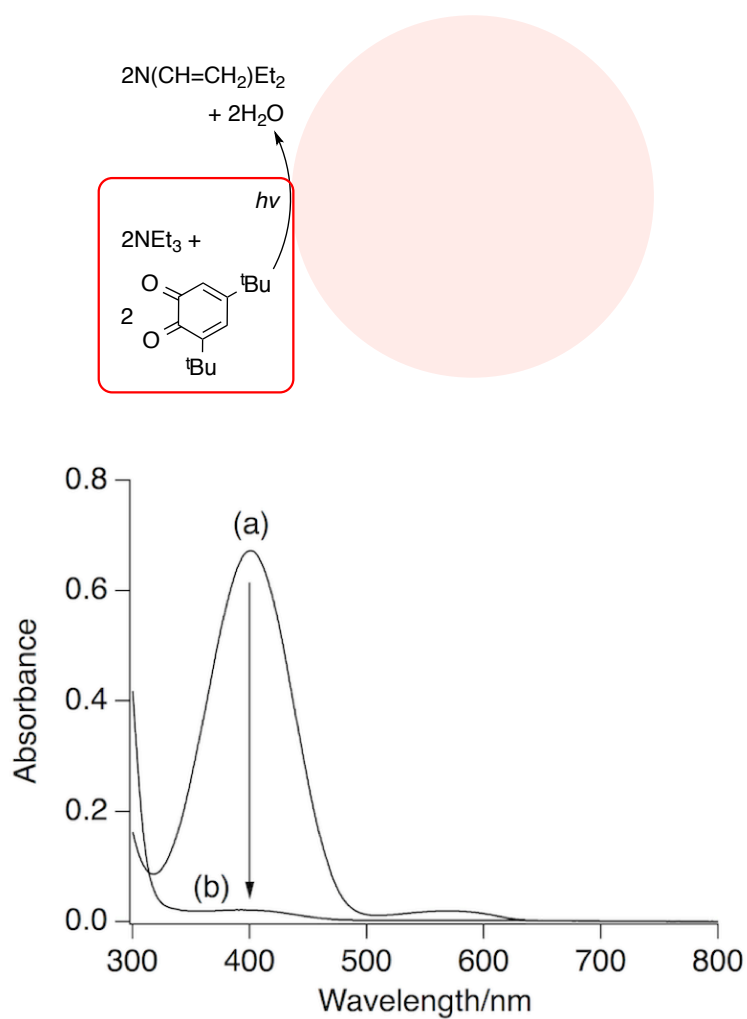

**Fig. S3** UV-vis spectra of 3,5-di-*t*-butyl-1,2-benzoquinone (DTBBQ) (400  $\mu\text{M}$ ) and  $\text{NEt}_3$  (4.0 mM) in  $\text{CH}_3\text{CN}$  (2.5 mL) (a) before and (b) after photo-irradiation (>550 nm).

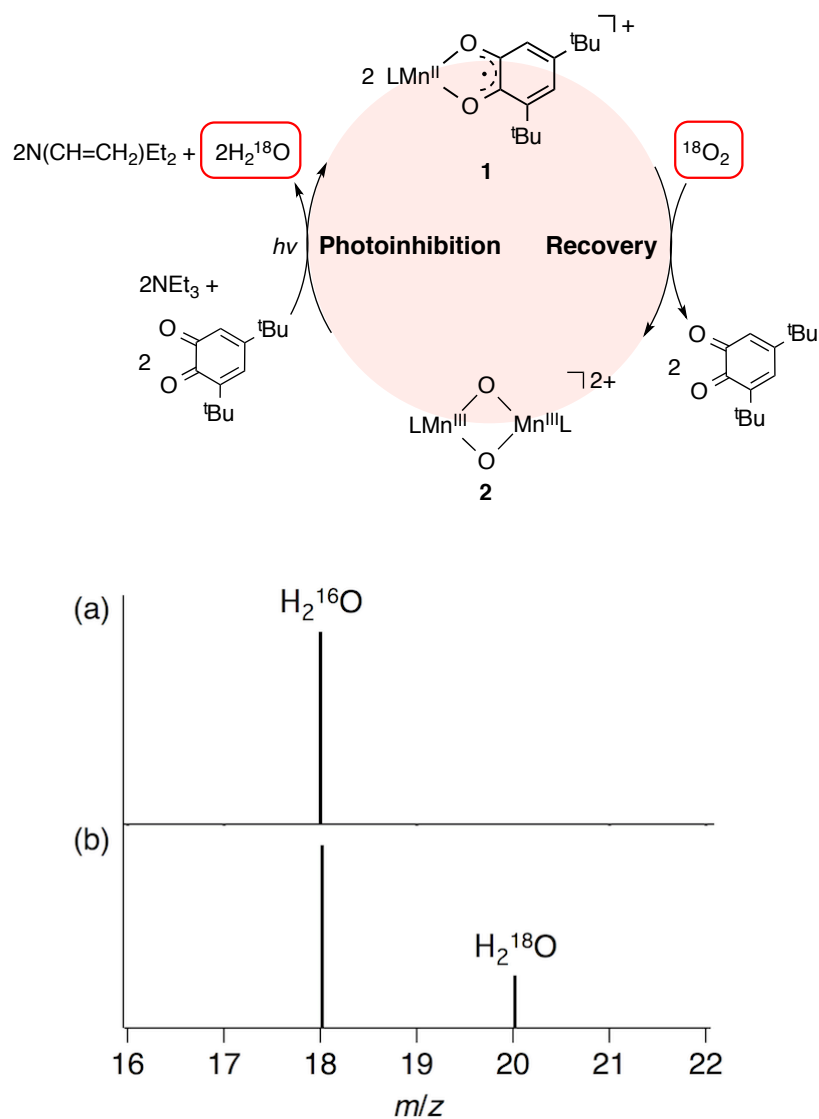

**Fig. S4** Positive-ion GC-mass spectra of H<sub>2</sub><sup>16</sup>O and H<sub>2</sub><sup>18</sup>O obtained from the reaction of **2** (1.4 mg, 1.0 μmol) with (a) <sup>16</sup>O<sub>2</sub> (5.0 mL) and (b) <sup>18</sup>O<sub>2</sub> (5.0 mL) in the presence of 3,5-di-*t*-butyl-1,2-benzoquinone (DTBBQ) (22 mg, 100 μmol) and NEt<sub>3</sub> (140 μL, 1.0 mmol) in CH<sub>3</sub>CN (200 μL) under photo-irradiation (>550 nm).

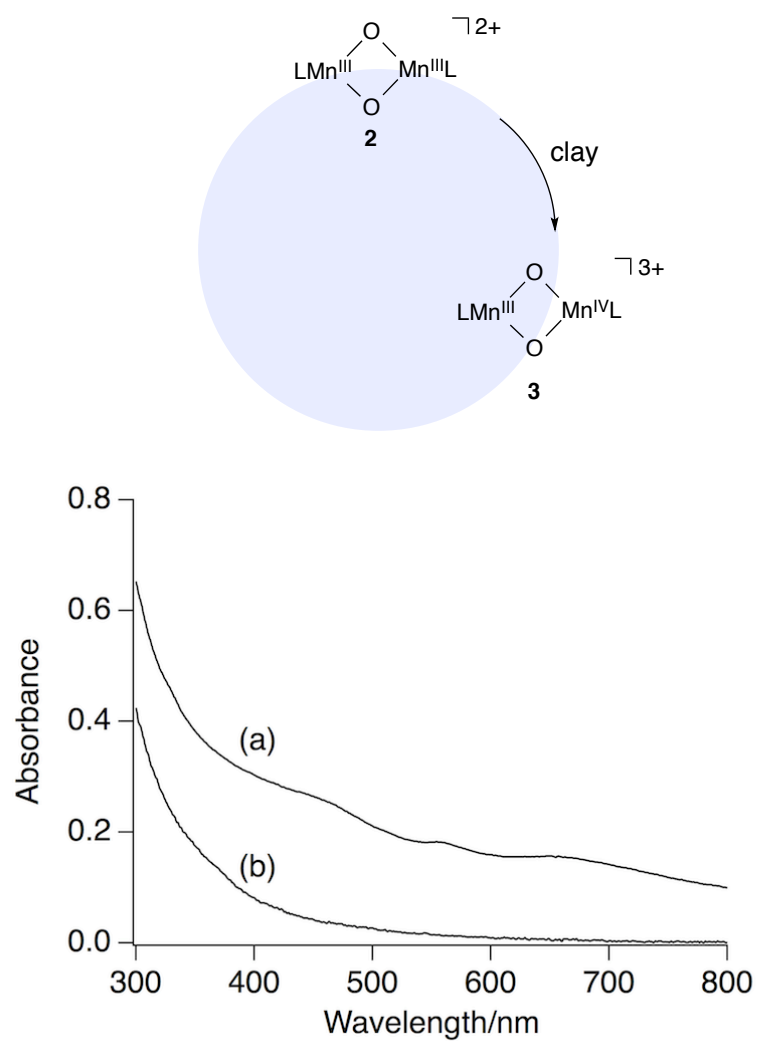

**Fig. S5** Diffuse reflectance UV-vis spectra of (a) 2·3@Clay and (b) clay.

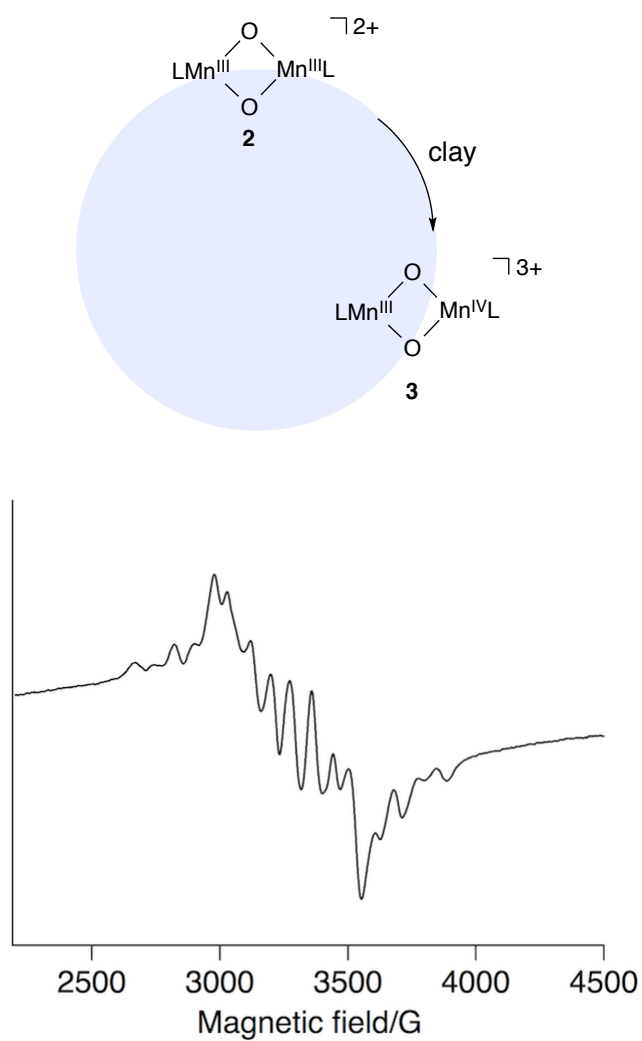

**Fig. S6** ESR spectrum of **2·3@Clay** (5.0 mg, content of the mixture of **2** and **3**: 300 nmol) suspended in DMF (500  $\mu$ L) at  $-150$  °C (microwave frequency: 9.16 GHz, microwave power: 1.0 mW).



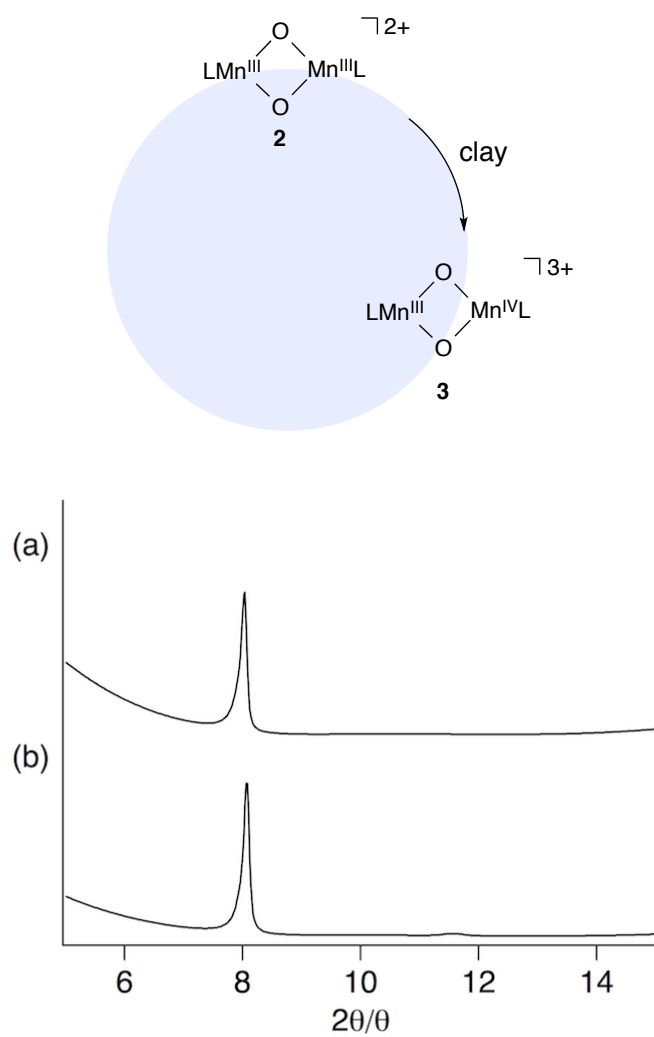

**Fig. S7** XRD patterns of (a) **2·3@Clay** and (b) clay.

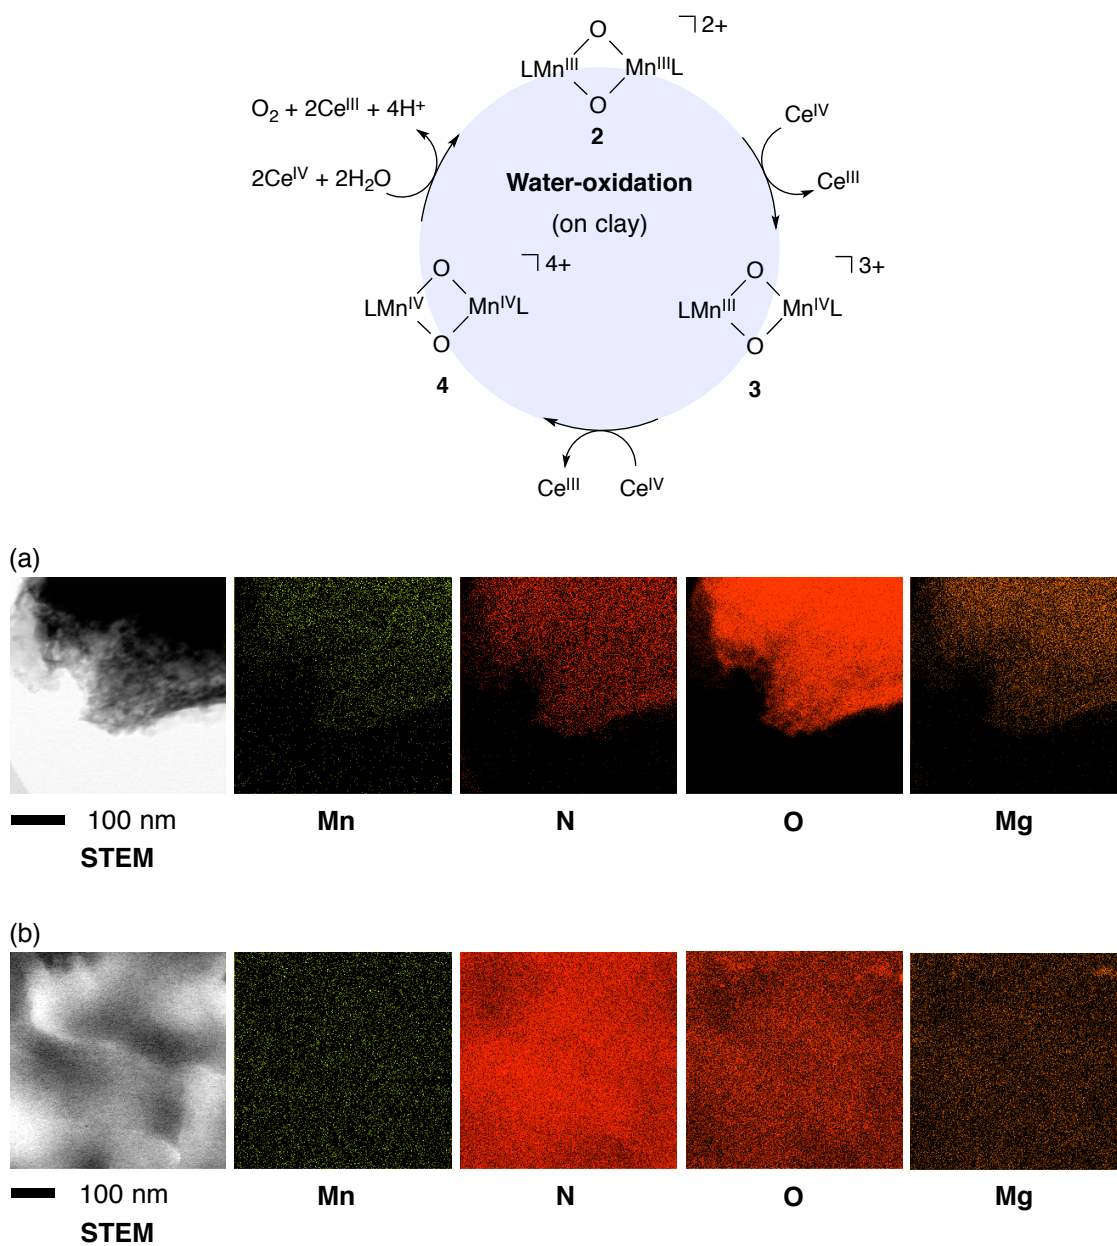

**Fig. S8** STEM images and EDS elemental mappings of (a) **2·3@Clay** and (b) clay material isolated from the mixture of **2·3@Clay** and  $\text{Ce}^{\text{IV}}$ .

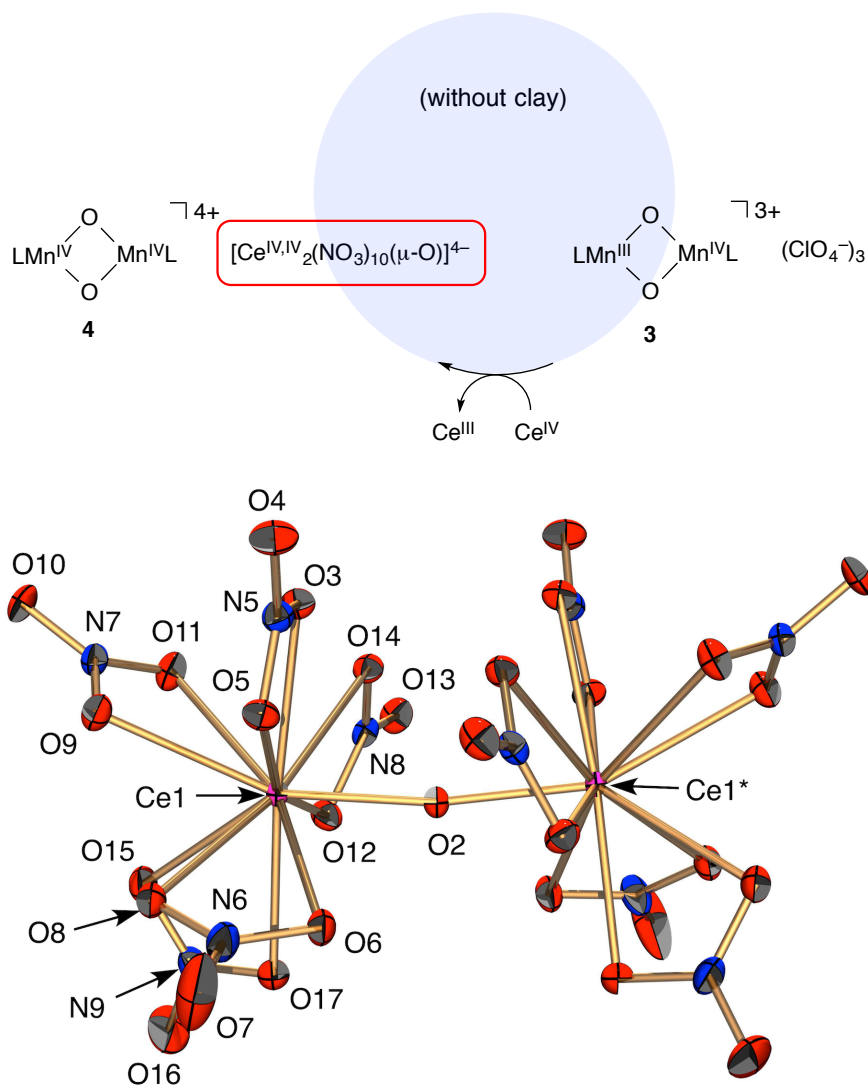

**Fig. S9** ORTEP drawing of  $[\text{Ce}^{\text{IV,IV}}_2(\text{NO}_3)_{10}(\mu\text{-O})]^{4-}$  with ellipsoids at 50% probability. The counter cation  $[\text{Mn}^{\text{IV,IV}}_2(\text{TPA})_2(\mu\text{-O})_2]^{4+}$  (**4**) is omitted for clarity. Selected interatomic distance ( $\text{\AA}$ ) and angle ( $^\circ$ ):  $\text{Ce1-O2} = 2.0480(2)$ ,  $\text{Ce1-O2-Ce1}^* = 170.70(11)$ .

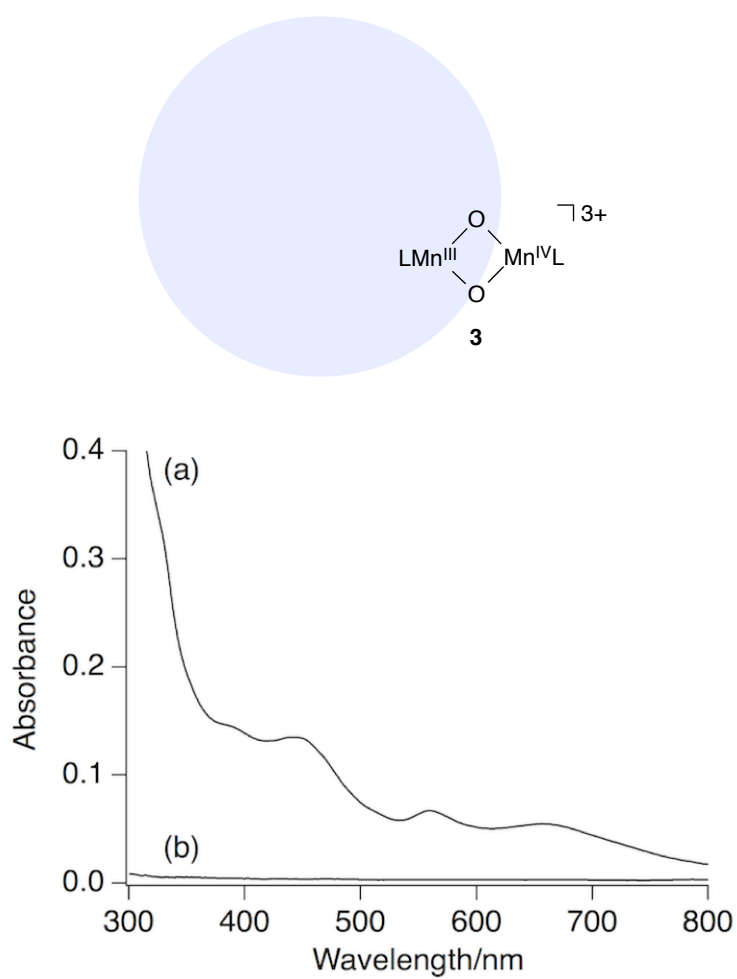

**Fig. S10** UV-vis spectra of (a) the CH<sub>3</sub>CN solution of **3** (100 μM) and (b) the supernatant CH<sub>3</sub>CN/water solution after adsorption of **3** on clay.

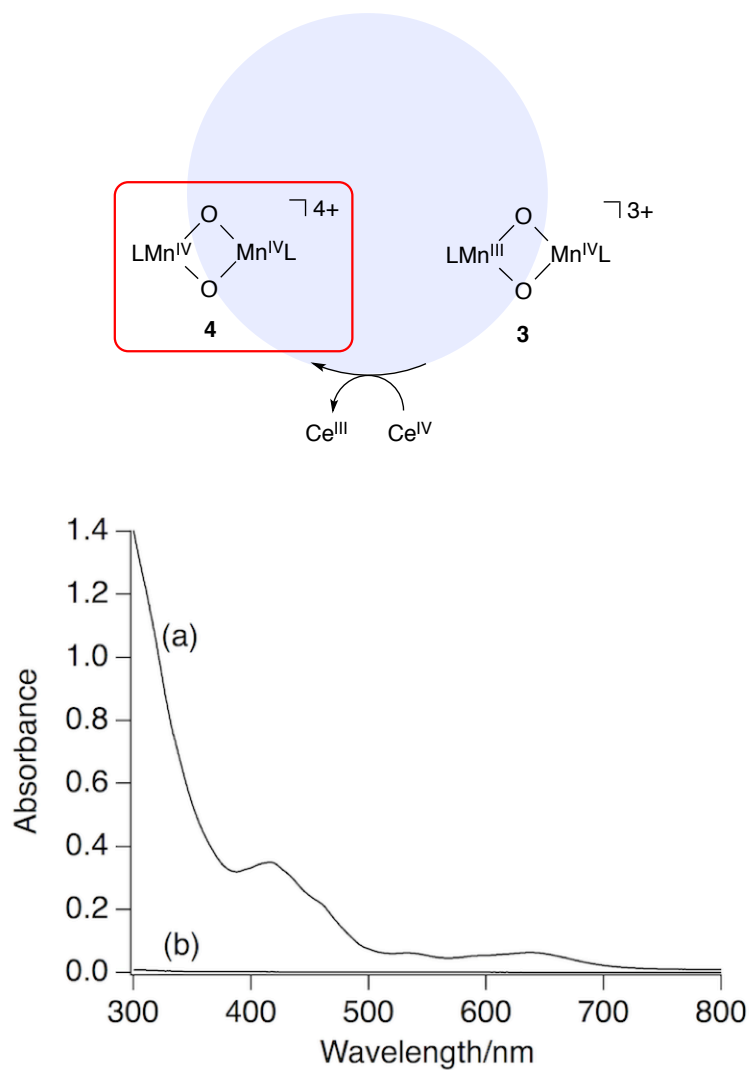

**Fig. S11** UV-vis spectra of (a) the aqueous solution of **4** (1.0 mM) and (b) the supernatant aqueous solution after adsorption of **4** on clay.

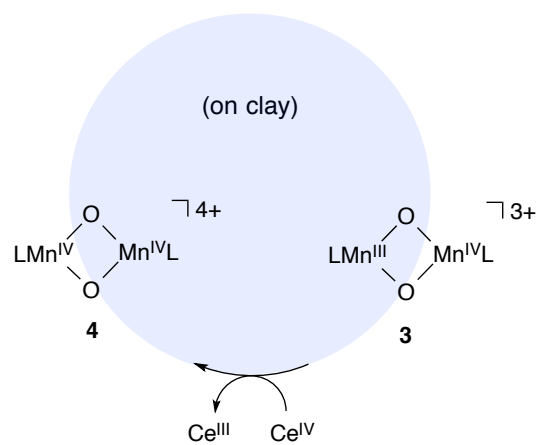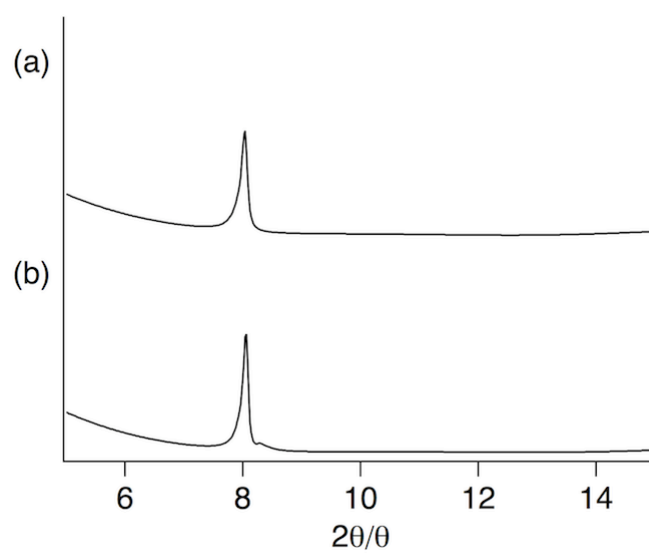

**Fig. S12** XRD patterns of (a)  $3@Clay$  and (b)  $4@Clay$ .

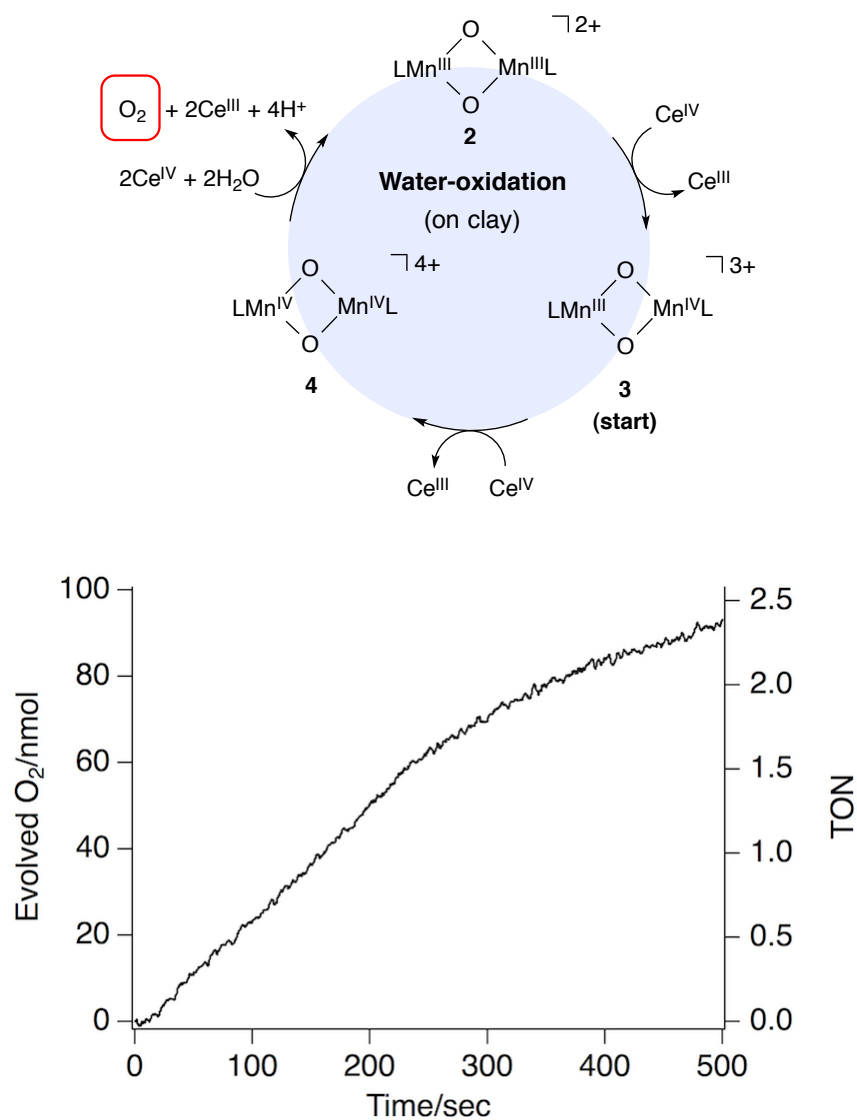

**Fig. S13** Time course of the evolved O<sub>2</sub> from the aqueous suspension (2.0 mL) of **3@Clay** (600 μg, content of **3**: 39 nmol) with an excess amount of (NH<sub>4</sub>)<sub>2</sub>[Ce<sup>IV</sup>(NO<sub>3</sub>)<sub>6</sub>] (137 mg, 250 μmol).

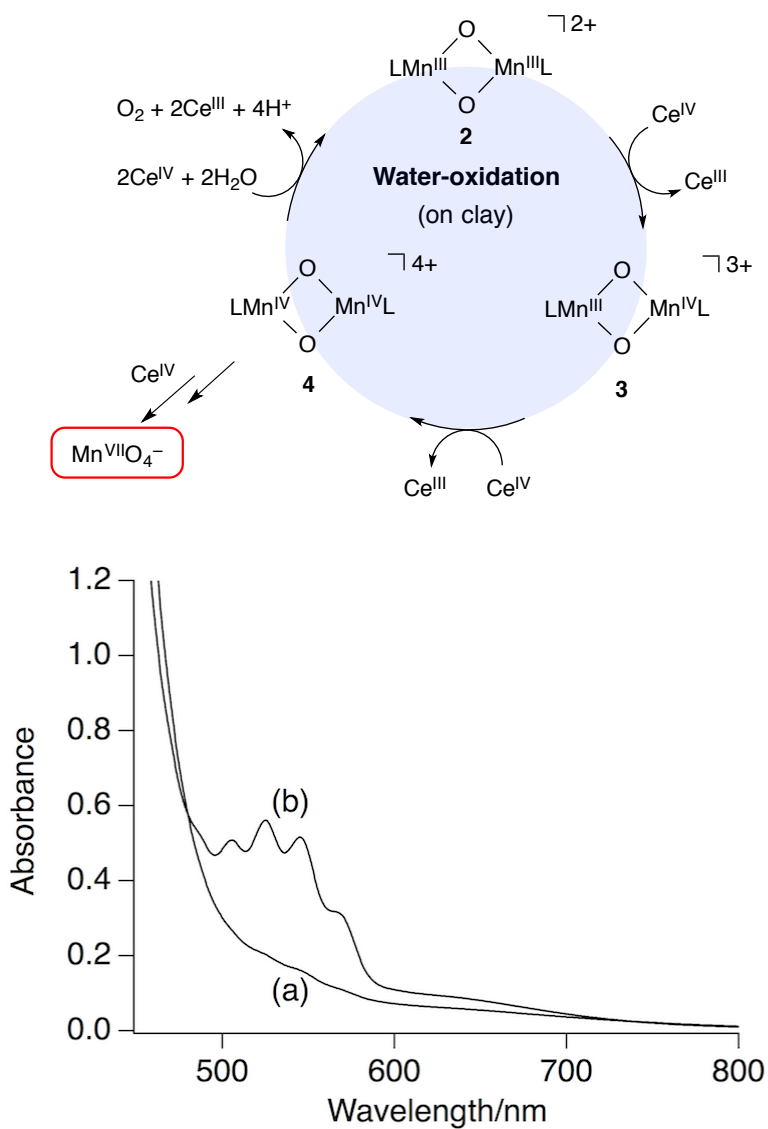

**Fig. S14** UV-vis spectra of the supernatant solution (3.0 mL) of the reaction of **3@Clay** (30 mg, content of **3**: 2.0  $\mu$ mol) with an excess amount of (NH<sub>4</sub>)<sub>2</sub>[Ce<sup>IV</sup>(NO<sub>3</sub>)<sub>6</sub>] (274 mg, 0.50 mmol) after (a) 0.5 min and (b) 60 min.



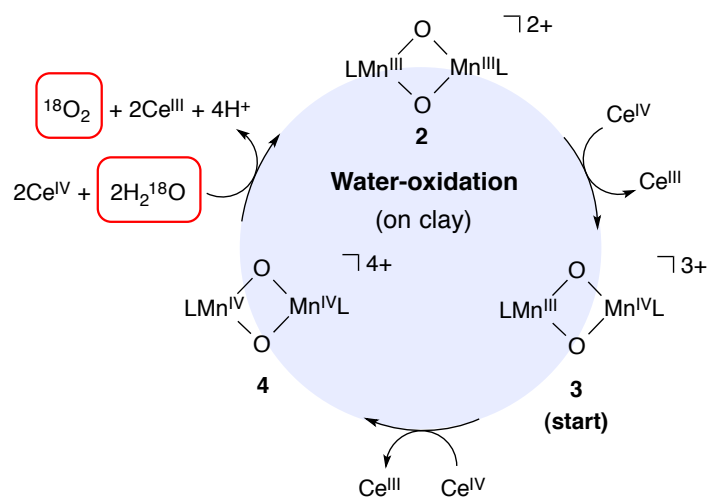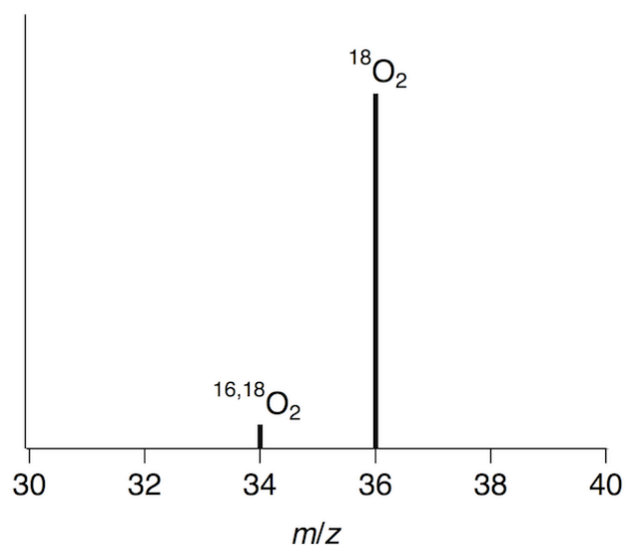

**Fig. S15** Positive-ion GC mass spectrum of <sup>16,18</sup>O<sub>2</sub> and <sup>18</sup>O<sub>2</sub> obtained from the H<sub>2</sub><sup>18</sup>O suspension (100 μL) of **3@Clay** (15 mg, content of **3**: 980 nmol) and (NH<sub>4</sub>)<sub>2</sub>[Ce<sup>IV</sup>(NO<sub>3</sub>)<sub>6</sub>] (27 mg, 49 μmol).

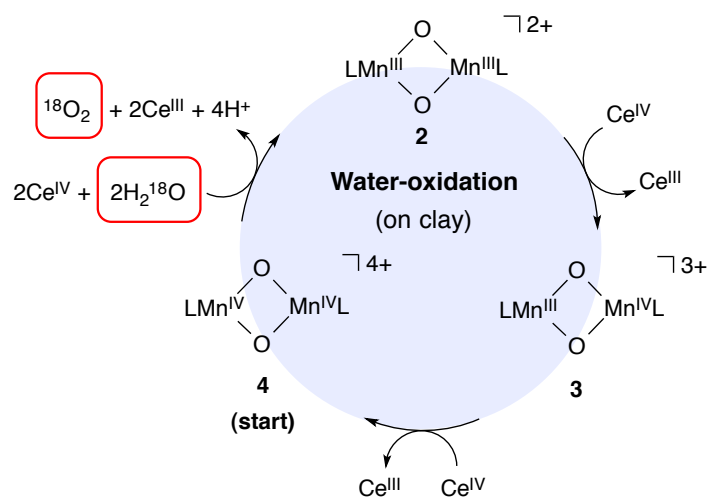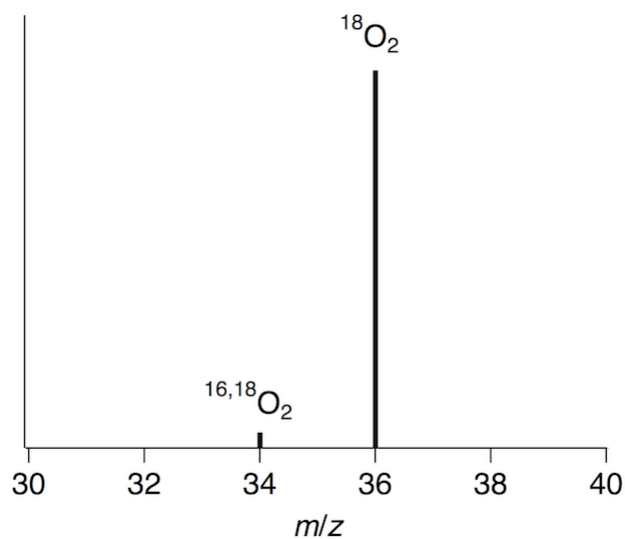

**Fig. S16** Positive-ion GC mass spectrum of <sup>16,18</sup>O<sub>2</sub> and <sup>18</sup>O<sub>2</sub> obtained from the H<sub>2</sub><sup>18</sup>O suspension (100 μL) of **4@Clay** (50 mg, content of **4**: 1.0 μmol) and (NH<sub>4</sub>)<sub>2</sub>[Ce<sup>IV</sup>(NO<sub>3</sub>)<sub>6</sub>] (27 mg, 49 μmol).
